# Supplementary material for: Tuning functionalized hexagonal boron nitride quantum dots for full visible-light fluorescence emission
Source: Royal Society of Chemistry journal article supplement (doi:10.1039/d2cp04728d), 2023-01-01
Supplement: d2cp04728d1.pdf [file d2cp04728d1.pdf]

# **Supplementary Information: Tuning functionalized hexagonal boron nitride quantum dots for full visible-light fluorescence emission**

*Yuan-Jun Gao<sup>\*a</sup> and Sang Kyu Kwak<sup>\*b</sup>*

<sup>a</sup> Department of Energy Engineering, School of Energy and Chemical Engineering, Ulsan National Institute of Science and Technology (UNIST), 50 UNIST-gil, Ulsan 44919, Republic of Korea

<sup>b</sup> Department of Chemical and Biological Engineering, Korea University, 145 Anam-ro, Seongbuk-gu, Seoul 02841, Republic of Korea

*E-mail:* [yuanjungao@unist.ac.kr](mailto:yuanjungao@unist.ac.kr) (Dr. Y.-J. Gao), [skkwak@korea.ac.kr](mailto:skkwak@korea.ac.kr) (Prof. S. K.

*Kwak)*

## **Table of Contents**

### **I Figures**

**Figure S1.** Optimized ground state structures of single  $sp^2$ -C or  $sp^3$ -C atom doped BNQDs. ....S4

**Figure S2.** Optimized ground state structures of C=C ( $sp^2$ -C) doped BNQDs. ....S5

**Figure S3.** Optimized ground state structures of single O atom doped BNQDs. ....S6

**Figure S4.** Optimized ground state structures of edge -OH and -NH<sub>2</sub> functionalized BNQDs. ....S6

**Figure S5.** The frontier molecular orbitals at S<sub>1</sub> minima of edge -OH and -NH<sub>2</sub> functionalized BNQDs. ....S7

**Figure S6.** Top view and side view of optimized ground state structure of **d**. ....S7

**Figure S7.** Electron–hole compositions in each fragment, and natural transition orbitals in vertical excitation for **a**.  
.....  
S9

**Figure S8.** Electron–hole compositions in each fragment, and natural transition orbitals in vertical excitation for **b**.

.....  
S11

**Figure S9.** Electron–hole compositions in each fragment, and natural transition orbitals in vertical excitation for **c**.

.....  
S13

**Figure S10.** Electron–hole compositions in each fragment, and natural transition orbitals in vertical excitation for **d**.

.....  
S15

**Figure S11.** Electron–hole compositions in each fragment, and natural transition orbitals in vertical excitation for **e**.

.....  
S17

**Figure S12.** Electron–hole compositions in each fragment, and natural transition orbitals in vertical excitation for **f**.

.....  
S19

**Figure S13.** Molecular orbitals of **d** used in defining the active space for MS-CASPT2(8e/8o) calculation.

.....  
.....S20

## **II Tables**

**Table S1.** Calculated Vertical Emission Energies, Oscillator Strengths, Wavelength, Key Electronic Configurations, and State Assignments Based on the  $S_1$  Minima of Single  $sp^3$ -C Atom Doped BNQDs.

.....S5

**Table S2.** Calculated Vertical Emission Energies, Oscillator Strengths, Wavelength, Key Electronic Configurations, and State Assignments Based on the  $S_1$  Minima of C=C ( $sp^2$ -C) Doped BNQDs. ....S5

**Table S3.** Calculated Vertical Emission Energies, Oscillator Strengths, Wavelength, Key Electronic Configurations, and State Assignments Based on the  $S_1$  Minima of Single O Atom Doped BNQDs. ....S6

**Table S4.** Calculated Vertical Emission Energies, Oscillator Strengths, Wavelength, Key Electronic Configurations, and State Assignments Based on the  $S_1$  Minima of Edge -OH and -NH<sub>2</sub> Functionalized BNQDs. ....S7

**Table S5.** Selected Bond Length and Dihedral Angle of BNQDs **a-f** at  $S_0$  and  $S_1$  Minima. ....S8

**Table S6.** Calculated Vertical Excitation Energies, Oscillator Strengths, Wavelength and Key Electronic Configurations of **a-f** in Aqueous Solution. ....S8

**Table S7.** The Contribution of Each Fragment to Electron and Hole in Vertical Excitation and Emission, also Collected the Overlap and Difference of Electron and Hole in Each Fragment for **a**. ....S10

**Table S8.** The Contribution of Each Fragment to Electron and Hole in Vertical Excitation and Emission, also Collected the Overlap and Difference of Electron and Hole in Each Fragment for **b**. ....S12

**Table S9.** The Contribution of Each Fragment to Electron and Hole in Vertical Excitation and Emission, also Collected the Overlap and Difference of Electron and Hole in Each Fragment for **c**. ....S14

**Table S10.** The Contribution of Each Fragment to Electron and Hole in Vertical Excitation and Emission, also Collected the Overlap and Difference of Electron and Hole in Each Fragment for **d**. ....S16

**Table S11.** The Contribution of Each Fragment to Electron and Hole in Vertical Excitation and Emission, also Collected the Overlap and Difference of Electron and Hole in Each Fragment for **e**. ....S18

**Table S12.** The Contribution of Each Fragment to Electron and Hole in Vertical Excitation and Emission, also Collected the Overlap and Difference of Electron and Hole in Each Fragment for **f**. .....S20

**Table S13.** MS-CASPT2 Evaluated Emission Energy (eV) and Wavelength ( $\lambda$ /nm) in Gas Phase. ...S21

**Table S14.** Calculated Vertical Emission Energies, Wavelength, Oscillator Strengths, and Key Electronic Configurations in Gas Phase and N,N-Dimethyl Formamide (DMF) Solution. ....S21

**Table S15.** Computed HOMO, LUMO and HOMO–LUMO Gap Energies (eV) of BNQDs **a–f** at  $S_0$  and  $S_1$  Minima. ....S22

**Table S16.** Computed  $S_r$  Index,  $D$  Index,  $H$  Index and  $t$  Index in Electron Excitation and Emission Process. ....S22

**Table S17.** B3LYP-D3BJ/6-311++G\*\*/SMD Computed Total Energies of Doped BNQDs at the Ground State. ....S22

## 1. Localized orbital locator (LOL) function

Localized orbital locator (LOL) function is defined as follows:<sup>1</sup>

$$LOL(r) = \frac{\tau(r)}{1 + \tau(r)} \quad (1)$$

in which

$$\tau(r) = \frac{D_0(r)}{\left(\frac{1}{2}\right) \sum_i \eta_i |\nabla \varphi_i|^2} \quad (2)$$

where  $D_0(r)$  is the exact kinetic energy density of non-interacting, uniform electron gas.

$LOL(r)$  is the ratio of the kinetic energy density of uniform electron gas to kinetic energy density of real system. Relatively lower kinetic energy density of real system compared to the kinetic energy density of uniform electron gas means large  $LOL(r)$  and high orbital localization.

## 2. Quantitative characterization of the electron–hole distribution in the whole space<sup>2</sup>

To evaluate overlapping extent of electron and hole,  $S_r$  index is defined as follows:

$$S_r \text{ index} = \int S_r(r) dr \equiv \int \sqrt{\rho^{hole}(r)\rho^{ele}(r)} dr \quad (3)$$

The most representative position of electron–hole distribution is obtained via calculating centroid. For example, X coordinate of electron centroid is expressed as

$$X_{ele} = \int x \rho^{ele}(r) dr \quad (4)$$

in which  $x$  is X component of position vector  $r$ .

The charge transfer (CT) length in X/Y/Z can be measured by distance between centroid of electron and hole in corresponding directions:

$$D_x = |X_{ele} - X_{hole}| \quad (5)$$

$$D_y = |Y_{ele} - Y_{hole}| \quad (6)$$

$$D_z = |Z_{ele} - Z_{hole}| \quad (7)$$

The total magnitude of CT length is referred to as  $D$  index:

$$D \text{ index} = |D| \equiv \sqrt{(D_x)^2 + (D_y)^2 + (D_z)^2} \quad (8)$$

The RMSD of electron and hole can be used to characterize their extent of spatial distribution. For example, X component of RMSD of hole is expressed as

$$\sigma_{hole,x} = \sqrt{\int (x - X_{hole})^2 \rho^{hole}(r) dr} \quad (9)$$

The  $|\sigma_{hole}|$  and  $|\sigma_{ele}|$  refer to  $\sigma_{hole}$  and  $\sigma_{ele}$  indices and they measure overall RMSD of electron and hole, respectively.

$H$  index is overall average degree of spatial extension of electron–hole distribution.

$$H \text{ index} = (|\sigma_{ele}| + |\sigma_{hole}|)/2 \quad (10)$$

$t$  index is designed to measure separation degree of electron and hole in CT direction:

$$t \text{ index} = D \text{ index} - H_{CT} \quad (11)$$

$H_{CT}$  is average degree of spatial extension of electron and hole in CT direction. To calculate  $H_{CT}$ , the following relationship is defined:

$$H_{CT} = |H \cdot u_{CT}| \quad (12)$$

where  $u_{CT}$  is unit vector in CT direction and can be straightforwardly derived using centroid of electron and hole.

If  $t$  index < 0, it implies that electron hole and is not substantially separated due to CT.

### 3. Orbital hybridization<sup>3</sup>

Based on the chemical bonding theory, supposing that one system contains two atoms (A and B). The A atom has one orbital  $\varphi_A$  and its orbital energy is  $\varepsilon_A$ ; and the B atom has one orbital  $\varphi_B$  and corresponding orbital energy is  $\varepsilon_B$ . The molecular orbital can be expressed as the linear combination of  $\varphi_A$  and  $\varphi_B$

$$\varphi = c[\varphi_A + \lambda\varphi_B] \quad (13)$$

in which  $c$  is the normalization coefficient and  $\lambda$  is expansion coefficient.

If  $\lambda \rightarrow 0$  or  $\lambda \rightarrow \infty$ ,  $\varphi$  is entirely composed by either  $\varphi_A$  or  $\varphi_B$ , thereto no hybridization. If  $\lambda = 1$  means the full hybridization.

### References

1. H.L. Schmider and A.D. Becke, *J. Mol. Struct.–THEOCHEM*, **2000**, 527, 51.
2. T. Lu and F. Chen, *J. Comput. Chem.*, **2012**, 33, 580.
3. X. Niu, Y. Li, H. Shu and J. Wang, *Nanoscale*, **2016**, 8, 19376.

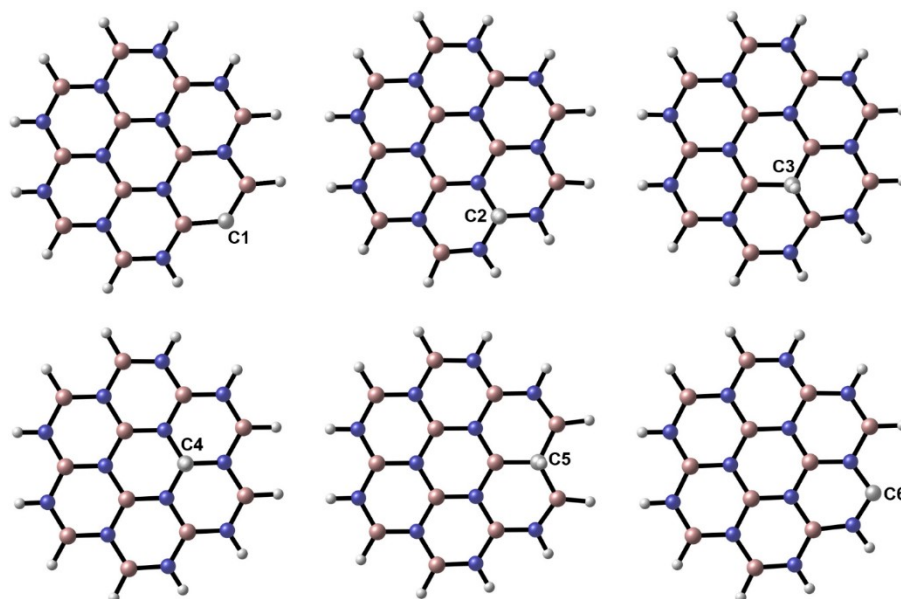

**Figure S1.** B3LYP-D3BJ/6-31G\*\* optimized ground state structures of single  $sp^2$ -C or  $sp^3$ -C atom doped BNQDs.

**Table S1.** B3LYP-D3BJ/6-31G\*\* Calculated Vertical Emission Energies ( $E_{\perp}$ /eV), Oscillator Strengths ( $f$ ), Wavelength ( $\lambda$ /nm), Key Electronic Configurations, and State Assignments Based on the  $S_1$  Minima of Single  $sp^3$ -C Atom Doped BNQDs.

|           | $E_{\perp}$ (eV) | $\lambda$ (nm) | $f$    | Configuration<br><b>s</b> | note                    |
|-----------|------------------|----------------|--------|---------------------------|-------------------------|
| <b>C1</b> | –                | –              | –      | –                         | Ground state is $T_1$ . |
| <b>C2</b> | 4.59             | 270            | 0.0015 | H–L (97.9 %)              |                         |
| <b>C3</b> | 4.83             | 257            | 0.0090 | H–L (97.2 %)              |                         |
| <b>C4</b> | 3.21             | 386            | 0.0123 | H–L (98.8 %)              |                         |
| <b>C5</b> | 1.75             | 707            | 0.0192 | H–L (99.1 %)              |                         |
| <b>C6</b> | 2.14             | 579            | 0.0013 | H–L (94.5 %)              | Ground state is $S_0$ . |

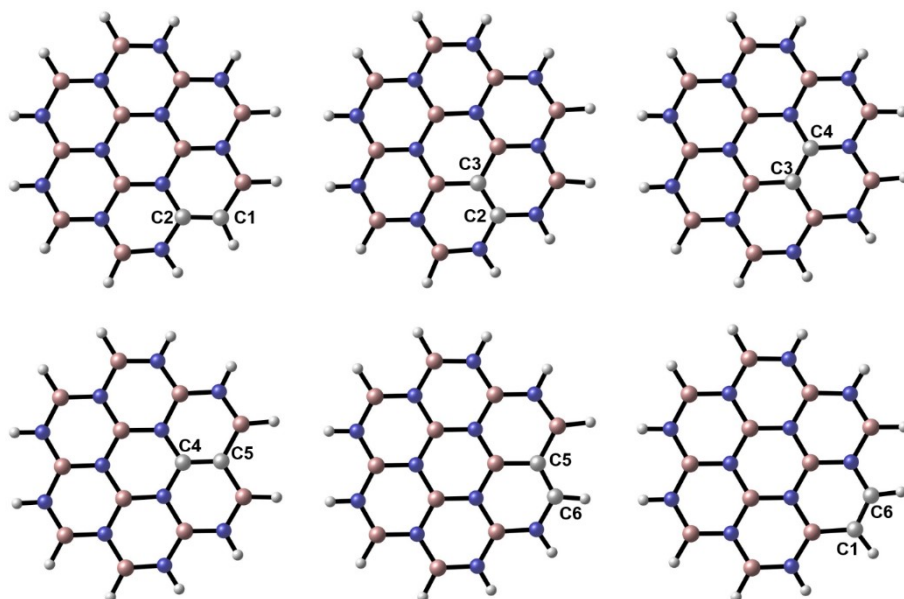

**Figure S2.** B3LYP-D3BJ/6-31G\*\* optimized ground state structures of C=C ( $sp^2$ -C) doped BNQDs.

**Table S2.** B3LYP-D3BJ/6-31G\*\* Calculated Vertical Emission Energies ( $E_{\perp}$ /eV), Oscillator Strengths ( $f$ ), Wavelength ( $\lambda$ /nm), Key Electronic Configurations, and State Assignments Based on the  $S_1$  Minima of C=C ( $sp^2$ -C) Doped BNQDs.

|             | $E_{\perp}$ (eV) | $\lambda$ (nm) | $f$    | Configurations |
|-------------|------------------|----------------|--------|----------------|
| <b>C1C2</b> | 3.93             | 315            | 0.1534 | H-L (89.6 %)   |
| <b>C2C3</b> | 4.19             | 296            | 0.1277 | H-L (97.5 %)   |
| <b>C3C4</b> | 4.94             | 315            | 0.0314 | H-L (88.7 %)   |
| <b>C4C5</b> | 4.43             | 280            | 0.2791 | H-L (95.5 %)   |
| <b>C5C6</b> | 4.46             | 266            | 0.2648 | H-L (95.0 %)   |
| <b>C6C1</b> | 4.66             | 258            | 0.0069 | H-L (93.9 %)   |



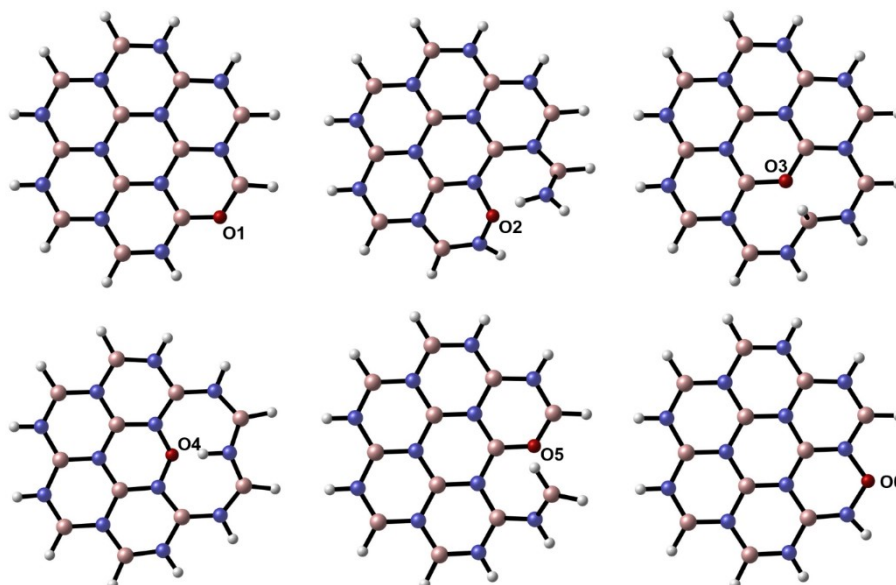

**Figure S3.** B3LYP-D3BJ/6-31G\*\* optimized ground state structures of single O atom doped BNQDs.

**Table S3.** B3LYP-D3BJ/6-31G\*\* Calculated Vertical Emission Energies ( $E_{\perp}$ /eV), Oscillator Strengths ( $f$ ), Wavelength ( $\lambda$ /nm), Key Electronic Configurations, and State Assignments Based on the  $S_1$  Minima of Single O Atom Doped BNQDs.

|                       | $E_{\perp}$ (eV) | $\lambda$ (nm) | $f$    | Configurations |
|-----------------------|------------------|----------------|--------|----------------|
| <b>O1</b>             | 5.88             | 211            | 0.0403 | H-L (44.1 %)   |
| <b>O2<sup>b</sup></b> | -                | -              | -      | -              |
| <b>O3</b>             | 1.02             | 1217           | 0.0009 | H-L (99.8 %)   |
| <b>O4</b>             | 3.31             | 375            | 0.0079 | H-L (99.6 %)   |
| <b>O5</b>             | 1.98             | 625            | 0.0002 | H-L (95.0 %)   |
| <b>O6</b>             | 3.47             | 357            | 0.0024 | H-L (97.7 %)   |

<sup>b</sup>: No stable excited state structure was obtained in geometric optimization.

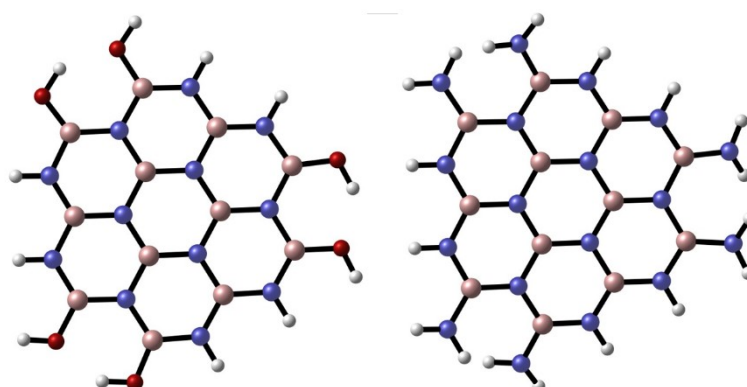

**Figure S4.** B3LYP-D3BJ/6-31G\*\* optimized ground state structures of edge -OH and -NH<sub>2</sub> functionalized BNQDs.

**Table S4.** Calculated Vertical Emission Energies ( $E_{\perp}$ /eV), Oscillator Strengths ( $f$ ), Wavelength ( $\lambda$ /nm), Key Electronic Configurations, and State Assignments Based on the  $S_1$  Minima of edge -OH and -NH<sub>2</sub> functionalized BNQDs.

|                              | $E_{\perp}$ (eV) | $\lambda$ (nm) | $f$    | Configurations                 |
|------------------------------|------------------|----------------|--------|--------------------------------|
| OH <sup>a</sup>              | 6.69             | 185            | 0.2223 | H→L (27.2 %), H-1→L+1 (27.8 %) |
| OH <sup>b</sup>              | 5.51             | 225            | 0.0008 |                                |
| NH <sub>2</sub> <sup>a</sup> | 6.45             | 192            | 0.0003 | H→L (44.7 %), H-1→L+1 (46.2 %) |

<sup>a</sup>: B3LYP-D3BJ/6-31G\*\*

<sup>b</sup>: B3LYP-D3BJ/6-311++G\*\*//B3LYP-D3BJ/6-31G\*\*

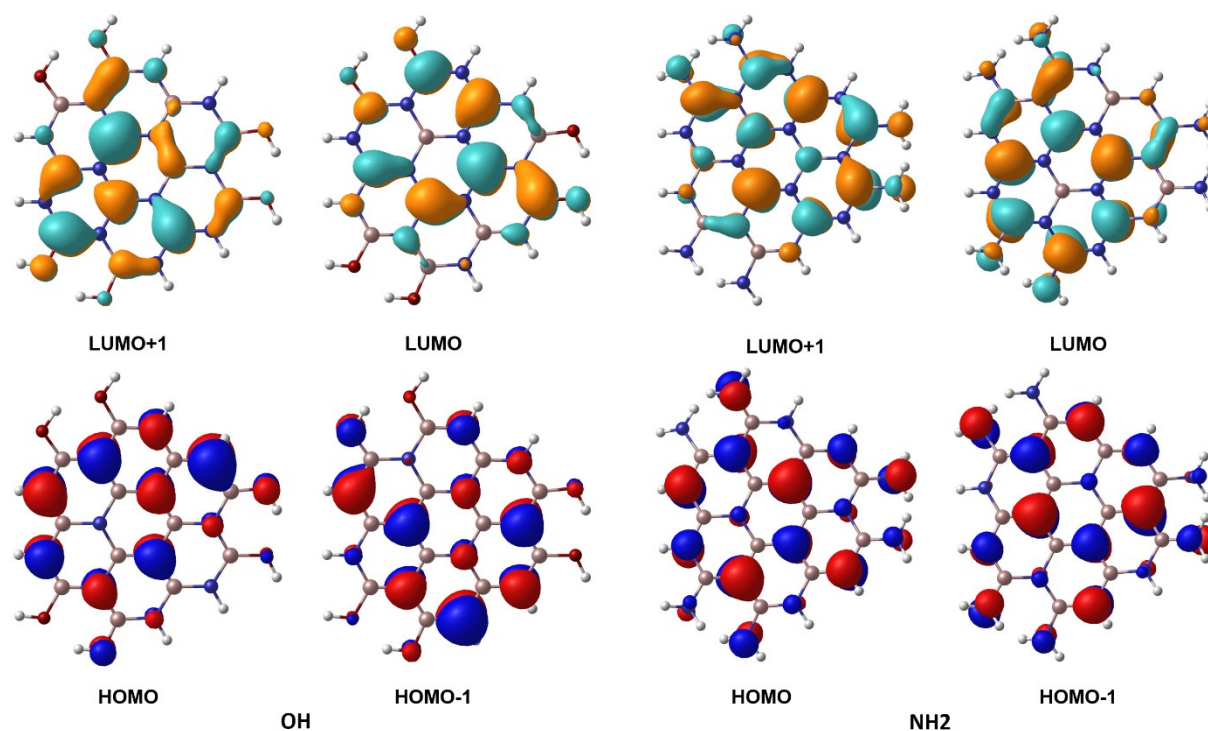

**Figure S5.** The frontier molecular orbitals at  $S_1$  minima of edge -OH and -NH<sub>2</sub> functionalized BNQDs.

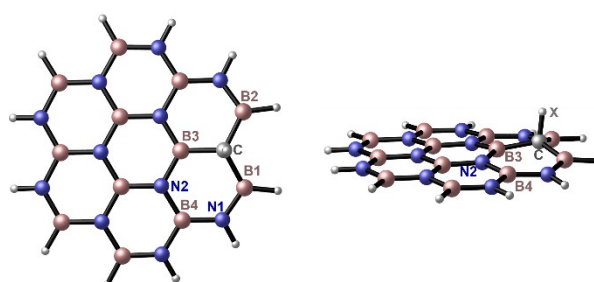

**Figure S6** Top view (left) and side view (right) of optimized ground state structure of **d**. Also show atomic number.

**Table S5.** Selected Bond Length (in Å) and Dihedral Angle (in °) of BNQDs **a-f** at  $S_0$  and  $S_1$  Minima.

| Bond Length (Å)    | $S_0$      |            |           | $S_1$      |            |           |
|--------------------|------------|------------|-----------|------------|------------|-----------|
|                    | B1-C       | B2-C       | B3-C      | B1-C       | B2-C       | B3-C      |
| <b>a</b>           | 1.580      | 1.586      | 1.589     | 1.587      | 1.590      | 1.692     |
| <b>b</b>           | 1.575      | 1.575      | 1.589     | 1.644      | 1.644      | 1.584     |
| <b>c</b>           | 1.584      | 1.580      | 1.592     | 1.668      | 1.556      | 1.565     |
| <b>d</b>           | 1.568      | 1.568      | 1.573     | 1.681      | 1.681      | 1.569     |
| <b>e</b>           | 1.574      | 1.571      | 1.581     | 1.630      | 1.630      | 1.591     |
| <b>f</b>           | 1.566      | 1.576      | 1.556     | 1.544      | 1.657      | 1.585     |
| Dihedral Angle (°) | B4-N2-B3-C | B4-N1-B1-C | N2-B3-C-X | B4-N2-B3-C | B4-N1-B1-C | N2-B3-C-X |
| <b>a</b>           | -12.0      | -0.9       | -80.5     | -20.6      | 4.3        | -85.8     |
| <b>b</b>           | -9.7       | 0.1        | -90.2     | -21.7      | 12.5       | -91.7     |
| <b>c</b>           | -14.3      | 10.4       | -81.4     | -15.3      | -6.8       | -57.1     |
| <b>d</b>           | -10.0      | 2.0        | -90.0     | -25.1      | 16.5       | -93.6     |
| <b>e</b>           | -10.3      | -3.1       | -96.2     | -25.2      | 8.6        | -91.0     |
| <b>f</b>           | -11.1      | 2.1        | -94.1     | -3.5       | 11.5       | -107.2    |

X: the atom of substitute group directly connected with inserted  $sp^3$ -C atom.

**Table S6.** B3LYP-D3BJ/6-311++G\*\*/SMD Calculated Vertical Excitation Energies ( $E_{\perp}$ /eV), Oscillator Strengths ( $f$ ), Wavelength ( $\lambda$ /nm) and Key Electronic Configurations of **a-f** in Aqueous Solution.

|          | States                | $E_{\perp}$ (eV) | $f$    | $\lambda$ (nm) | Configurations (NTO) |
|----------|-----------------------|------------------|--------|----------------|----------------------|
| <b>a</b> | $S_0 \rightarrow S_1$ | 4.02             | 0.0039 | 308            | H→L (99.86%)         |
|          | $S_0 \rightarrow S_2$ | 4.89             | 0.0045 | 253            | H→L (98.99%)         |
|          | $S_0 \rightarrow S_4$ | 5.36             | 0.1630 | 231            | H→L (98.15%)         |
|          | $S_0 \rightarrow S_9$ | 5.89             | 0.0553 | 211            | H→L (91.10%)         |
| <b>b</b> | $S_0 \rightarrow S_1$ | 4.47             | 0.0035 | 277            | H→L (99.75%)         |
|          | $S_0 \rightarrow S_2$ | 4.81             | 0.0122 | 258            | H→L (99.53%)         |
|          | $S_0 \rightarrow S_4$ | 5.35             | 0.1529 | 232            | H→L (98.48%)         |
|          | $S_0 \rightarrow S_9$ | 5.86             | 0.0657 | 212            | H→L (92.97%)         |
| <b>c</b> | $S_0 \rightarrow S_1$ | 4.33             | 0.0032 | 286            | H→L (99.84%)         |
|          | $S_0 \rightarrow S_2$ | 5.05             | 0.0244 | 246            | H→L (99.55%)         |
|          | $S_0 \rightarrow S_4$ | 5.45             | 0.0335 | 228            | H→L (74.60%)         |
|          | $S_0 \rightarrow S_9$ | 5.87             | 0.1982 | 211            | H→L (85.09%)         |
| <b>d</b> | $S_0 \rightarrow S_1$ | 5.71             | 0.0601 | 217            | H→L (91.06%)         |
|          | $S_0 \rightarrow S_2$ | 5.94             | 0.0288 | 209            | H→L (94.89%)         |
|          | $S_0 \rightarrow S_4$ | 6.04             | 0.3146 | 205            | H→L (74.50%)         |
|          | $S_0 \rightarrow S_9$ | 6.30             | 0.0226 | 197            | H→L (43.76%)         |
| <b>e</b> | $S_0 \rightarrow S_1$ | 4.26             | 0.0211 | 291            | H→L (99.75%)         |
|          | $S_0 \rightarrow S_2$ | 5.23             | 0.0120 | 237            | H→L (97.00%)         |
|          | $S_0 \rightarrow S_4$ | 5.67             | 0.2166 | 219            | H→L (89.14%)         |
|          | $S_0 \rightarrow S_9$ | 5.76             | 0.0215 | 215            | H→L (69.69%)         |
| <b>f</b> | $S_0 \rightarrow S_1$ | 4.54             | 0.0258 | 273            | H→L (99.28%)         |
|          | $S_0 \rightarrow S_2$ | 4.71             | 0.0325 | 263            | H→L (99.78%)         |
|          | $S_0 \rightarrow S_4$ | 5.84             | 0.1361 | 212            | H→L (91.02%)         |

|  |                                    |      |        |     |              |
|--|------------------------------------|------|--------|-----|--------------|
|  | <b>S<sub>0</sub>→S<sub>9</sub></b> | 6.00 | 0.1879 | 207 | H→L (76.96%) |
|--|------------------------------------|------|--------|-----|--------------|

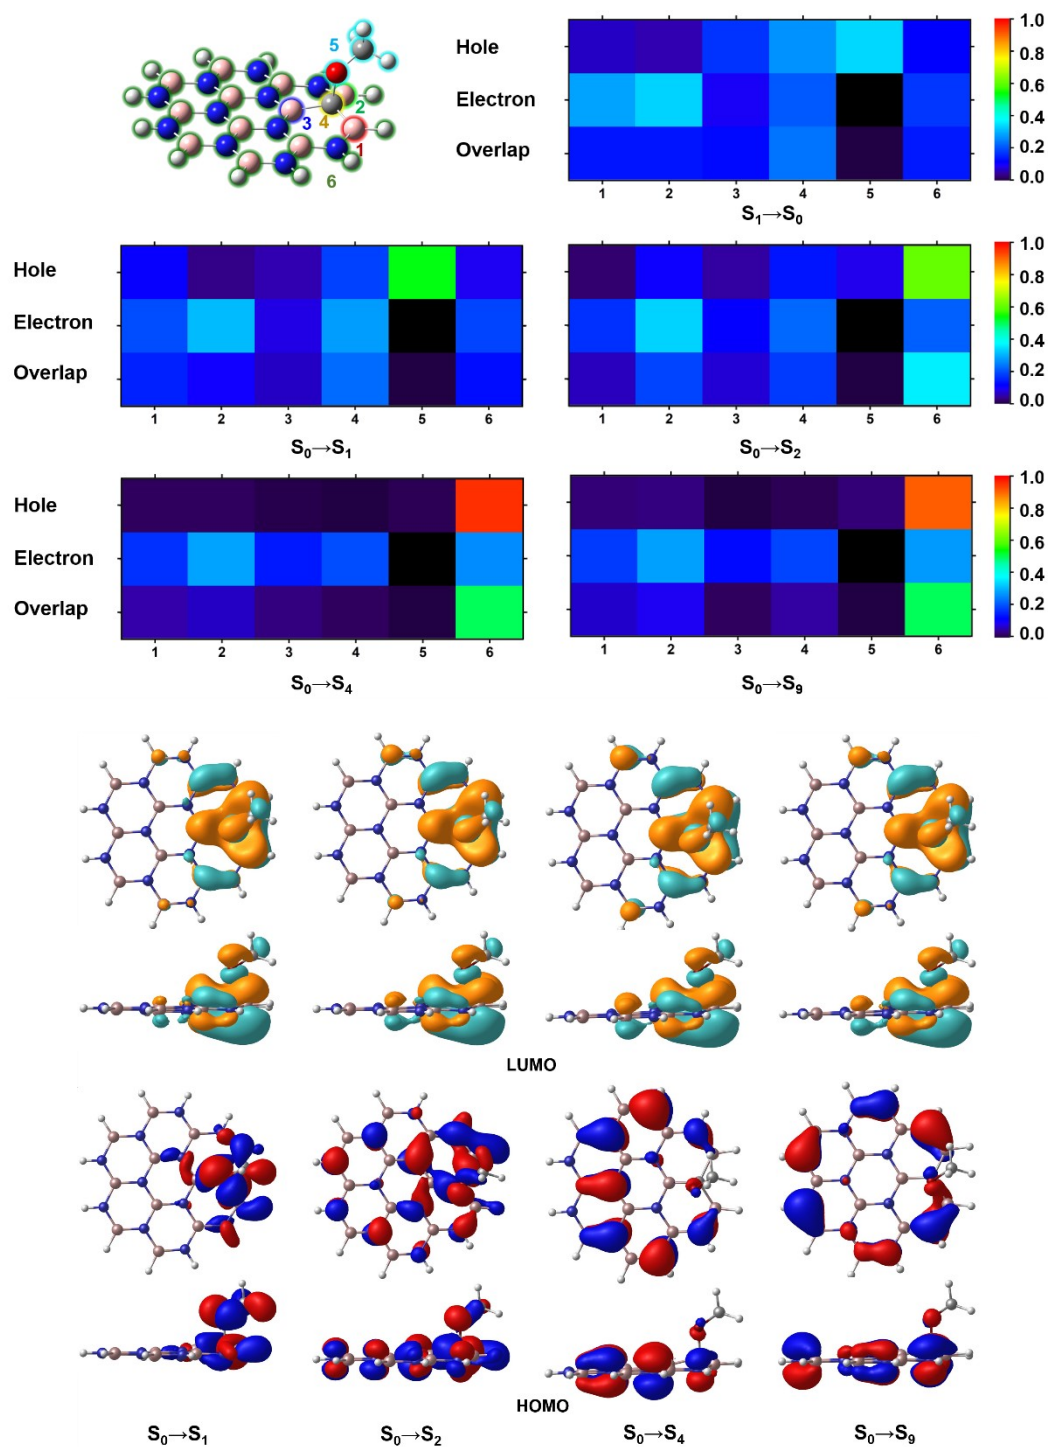

**Figure S7.** Electron–hole compositions in each fragment (top), and natural transition orbitals (NTO) in vertical excitation (down) for **a**.

**Table S7.** The Contribution (%) of Each Fragment to Electron and Hole in Vertical Excitation and Emission, also Collected the Overlap and Difference of Electron and Hole in Each Fragment for **a**.

|                                    | Fragment | Hole (%) | Electron (%) | Overlap (%) | Diff (%) |
|------------------------------------|----------|----------|--------------|-------------|----------|
| <b>S<sub>0</sub>→S<sub>1</sub></b> | 1        | 10.99    | 19.55        | 14.65       | 8.56     |
|                                    | 2        | 3.32     | 30.86        | 10.12       | 27.54    |
|                                    | 3        | 5.23     | 8.00         | 6.47        | 2.77     |
|                                    | 4        | 18.24    | 27.85        | 22.54       | 9.61     |
|                                    | 5        | 53.25    | -4.90        | 0.00        | -58.15   |
|                                    | 6        | 8.97     | 18.64        | 12.93       | 9.67     |
| <b>S<sub>0</sub>→S<sub>2</sub></b> | 1        | 2.25     | 16.52        | 6.09        | 14.27    |
|                                    | 2        | 10.35    | 33.45        | 18.61       | 23.10    |
|                                    | 3        | 4.66     | 11.30        | 7.26        | 6.64     |
|                                    | 4        | 13.63    | 22.29        | 17.43       | 8.65     |
|                                    | 5        | 8.52     | -4.84        | 0.00        | -13.36   |
|                                    | 6        | 60.58    | 21.28        | 35.90       | -39.30   |
| <b>S<sub>0</sub>→S<sub>4</sub></b> | 1        | 1.56     | 16.33        | 5.04        | 14.77    |
|                                    | 2        | 1.49     | 28.65        | 6.53        | 27.16    |
|                                    | 3        | 0.58     | 13.97        | 2.86        | 13.38    |
|                                    | 4        | 0.08     | 19.45        | 1.22        | 19.37    |
|                                    | 5        | 0.96     | -4.36        | 0.00        | -5.32    |
|                                    | 6        | 95.33    | 25.97        | 49.76       | -69.36   |
| <b>S<sub>0</sub>→S<sub>9</sub></b> | 1        | 2.61     | 17.51        | 6.76        | 14.89    |
|                                    | 2        | 2.78     | 28.27        | 8.86        | 25.49    |
|                                    | 3        | 0.17     | 12.44        | 1.44        | 12.27    |
|                                    | 4        | 1.16     | 18.84        | 4.68        | 17.68    |
|                                    | 5        | 2.55     | -4.33        | 0.00        | -6.88    |
|                                    | 6        | 90.73    | 27.28        | 49.75       | -63.45   |
| <b>S<sub>1</sub>→S<sub>0</sub></b> | 1        | 6.34     | 28.60        | 13.47       | 22.26    |
|                                    | 2        | 5.46     | 33.23        | 13.47       | 27.77    |
|                                    | 3        | 16.69    | 9.37         | 12.51       | -7.32    |
|                                    | 4        | 26.48    | 20.50        | 23.30       | -5.99    |
|                                    | 5        | 33.60    | -8.87        | 0.00        | -42.47   |
|                                    | 6        | 11.42    | 17.16        | 14.00       | 5.74     |

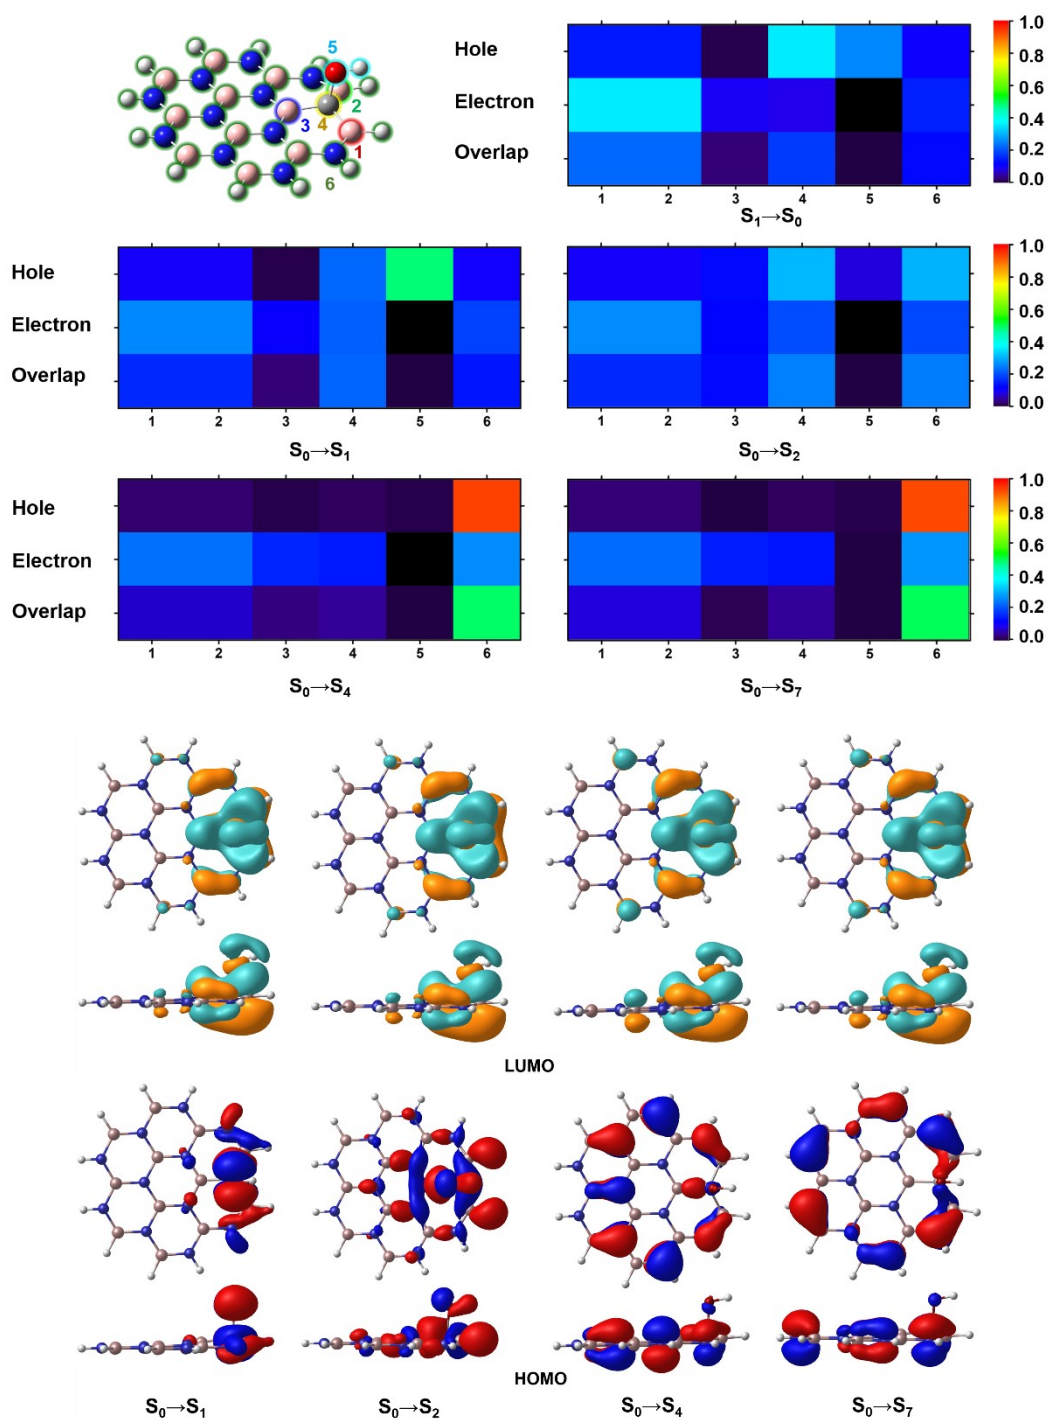

**Figure S8.** Electron–hole compositions in each fragment (top), and natural transition orbitals (NTO) in vertical excitation (down) for **b**.



**Table S8.** The Contribution (%) of Each Fragment to Electron and Hole in Vertical Excitation and Emission, also Collected the Overlap and Difference of Electron and Hole in Each Fragment for **b**.

|                       | Fragment | Hole (%) | Electron (%) | Overlap (%) | Diff (%) |
|-----------------------|----------|----------|--------------|-------------|----------|
| $S_0 \rightarrow S_1$ | 1        | 9.57     | 25.35        | 15.58       | 15.78    |
|                       | 2        | 9.52     | 25.36        | 15.54       | 15.84    |
|                       | 3        | 0.59     | 10.81        | 2.53        | 10.22    |
|                       | 4        | 22.18    | 21.65        | 21.91       | -0.53    |
|                       | 5        | 48.27    | -1.55        | 0.00        | -49.82   |
|                       | 6        | 9.87     | 18.38        | 13.47       | 8.51     |
| $S_0 \rightarrow S_2$ | 1        | 9.54     | 25.68        | 15.65       | 16.14    |
|                       | 2        | 9.60     | 25.69        | 15.71       | 16.09    |
|                       | 3        | 12.52    | 12.03        | 12.27       | -0.49    |
|                       | 4        | 30.57    | 19.54        | 24.44       | -11.03   |
|                       | 5        | 7.71     | -2.21        | 0.00        | -9.91    |
|                       | 6        | 30.06    | 19.27        | 24.07       | -10.79   |
| $S_0 \rightarrow S_4$ | 1        | 2.01     | 22.95        | 6.79        | 20.94    |
|                       | 2        | 2.00     | 22.96        | 6.78        | 20.96    |
|                       | 3        | 0.64     | 15.20        | 3.11        | 14.57    |
|                       | 4        | 1.22     | 13.90        | 4.12        | 12.68    |
|                       | 5        | 0.57     | -0.68        | 0.00        | -1.25    |
|                       | 6        | 93.56    | 25.66        | 49.00       | -67.90   |
| $S_0 \rightarrow S_7$ | 1        | 2.69     | 22.59        | 7.80        | 19.89    |
|                       | 2        | 2.70     | 22.60        | 7.81        | 19.90    |
|                       | 3        | 0.07     | 14.31        | 1.03        | 14.24    |
|                       | 4        | 1.33     | 13.57        | 4.24        | 12.24    |
|                       | 5        | 0.64     | 0.14         | 0.30        | -0.49    |
|                       | 6        | 92.57    | 26.79        | 49.80       | -65.78   |
| $S_1 \rightarrow S_0$ | 1        | 13.82    | 35.67        | 22.21       | 21.85    |
|                       | 2        | 13.83    | 35.68        | 22.21       | 21.85    |
|                       | 3        | 0.69     | 9.19         | 2.51        | 8.50     |
|                       | 4        | 35.56    | 8.51         | 17.39       | -27.05   |
|                       | 5        | 25.56    | -3.62        | 0.00        | -29.18   |
|                       | 6        | 10.55    | 14.58        | 12.40       | 4.03     |

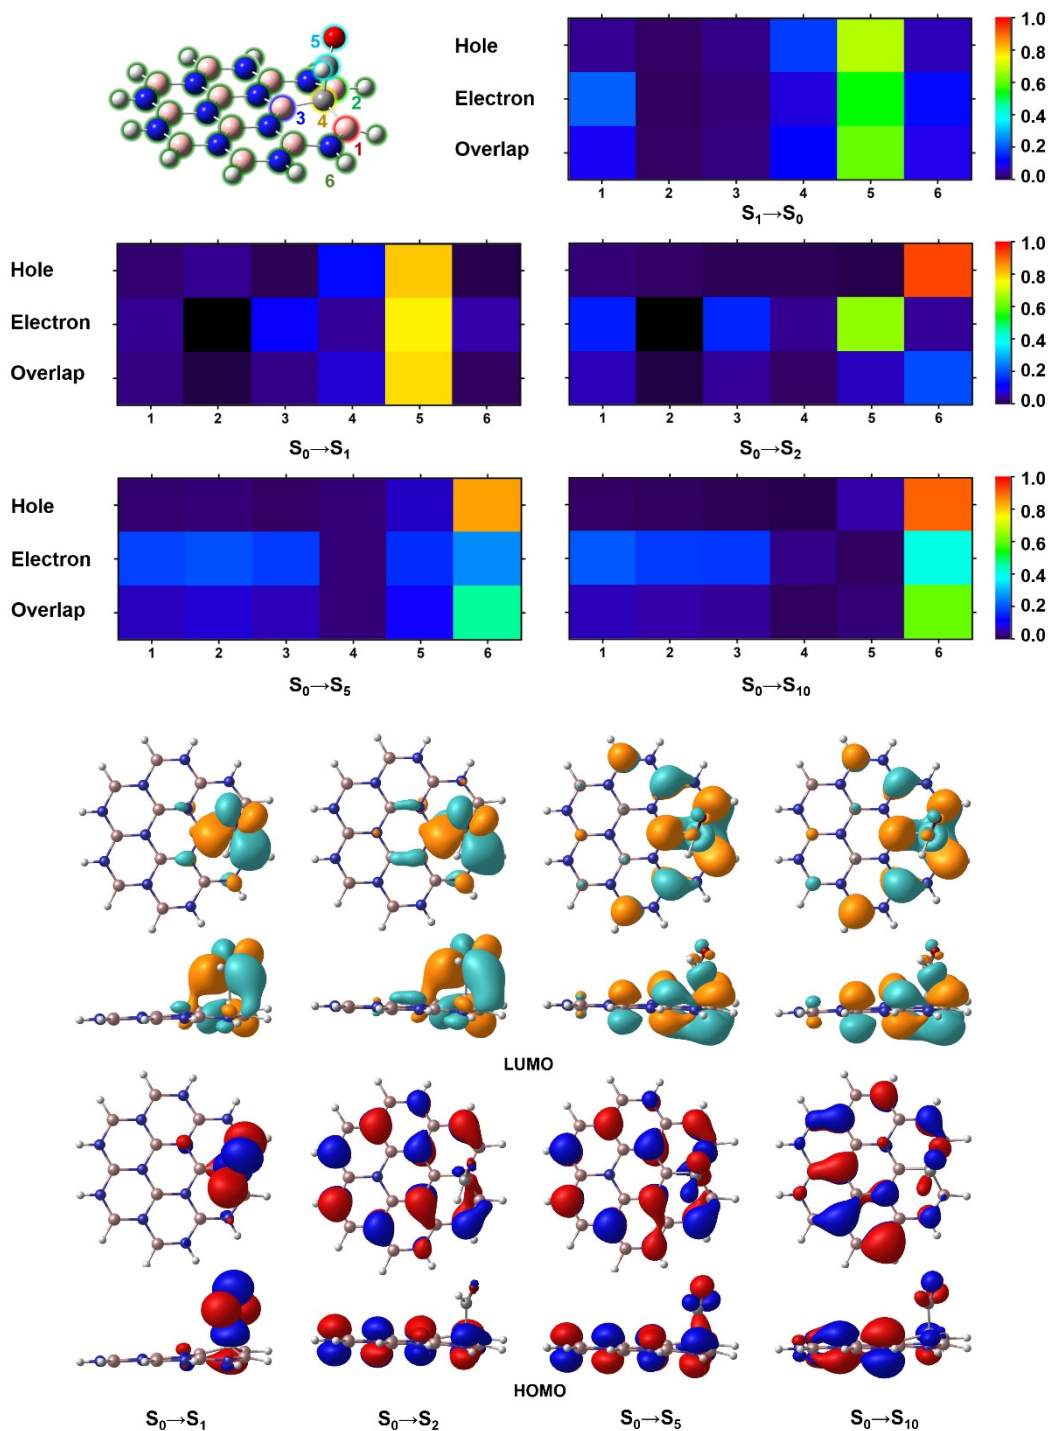

**Figure S9.** Electron–hole compositions in each fragment (top), and natural transition orbitals (NTO) in vertical excitation (down) for **c**.

**Table S9.** The Contribution (%) of Each Fragment to Electron and Hole in Vertical Excitation and Emission, also Collected the Overlap and Difference of Electron and Hole in Each Fragment for **c**.

|                          | Fragment | Hole (%) | Electron (%) | Overlap (%) | Diff (%) |
|--------------------------|----------|----------|--------------|-------------|----------|
| $S_0 \rightarrow S_1$    | 1        | 2.12     | 3.71         | 2.81        | 1.59     |
|                          | 2        | 3.55     | -0.03        | 0.00        | -3.58    |
|                          | 3        | 0.96     | 10.88        | 3.22        | 9.92     |
|                          | 4        | 12.51    | 4.20         | 7.25        | -8.31    |
|                          | 5        | 80.38    | 76.51        | 78.42       | -3.87    |
|                          | 6        | 0.49     | 4.73         | 1.53        | 4.24     |
| $S_0 \rightarrow S_2$    | 1        | 2.43     | 14.22        | 5.88        | 11.79    |
|                          | 2        | 1.65     | -2.00        | 0.00        | -3.65    |
|                          | 3        | 1.14     | 15.23        | 4.17        | 14.09    |
|                          | 4        | 0.91     | 3.64         | 1.82        | 2.72     |
|                          | 5        | 0.58     | 64.80        | 6.13        | 64.23    |
|                          | 6        | 93.28    | 4.11         | 19.58       | -89.17   |
| $S_0 \rightarrow S_5$    | 1        | 2.10     | 18.37        | 6.22        | 16.26    |
|                          | 2        | 2.59     | 19.98        | 7.20        | 17.38    |
|                          | 3        | 1.79     | 17.44        | 5.58        | 15.65    |
|                          | 4        | 2.55     | 2.71         | 2.63        | 0.17     |
|                          | 5        | 6.36     | 15.75        | 10.01       | 9.39     |
|                          | 6        | 84.61    | 25.75        | 46.68       | -58.86   |
| $S_0 \rightarrow S_{10}$ | 1        | 1.58     | 20.69        | 5.72        | 19.11    |
|                          | 2        | 1.48     | 17.55        | 5.10        | 16.07    |
|                          | 3        | 0.96     | 17.16        | 4.06        | 16.19    |
|                          | 4        | 0.49     | 3.19         | 1.25        | 2.70     |
|                          | 5        | 5.05     | 1.25         | 2.52        | -3.79    |
|                          | 6        | 90.43    | 40.16        | 60.27       | -50.27   |
| $S_1 \rightarrow S_0$    | 1        | 3.84     | 21.54        | 9.09        | 17.70    |
|                          | 2        | 1.74     | 1.52         | 1.63        | -0.22    |
|                          | 3        | 3.29     | 2.59         | 2.92        | -0.71    |
|                          | 4        | 17.85    | 7.61         | 11.65       | -10.24   |
|                          | 5        | 67.73    | 54.25        | 60.62       | -13.49   |
|                          | 6        | 5.55     | 12.50        | 8.33        | 6.94     |

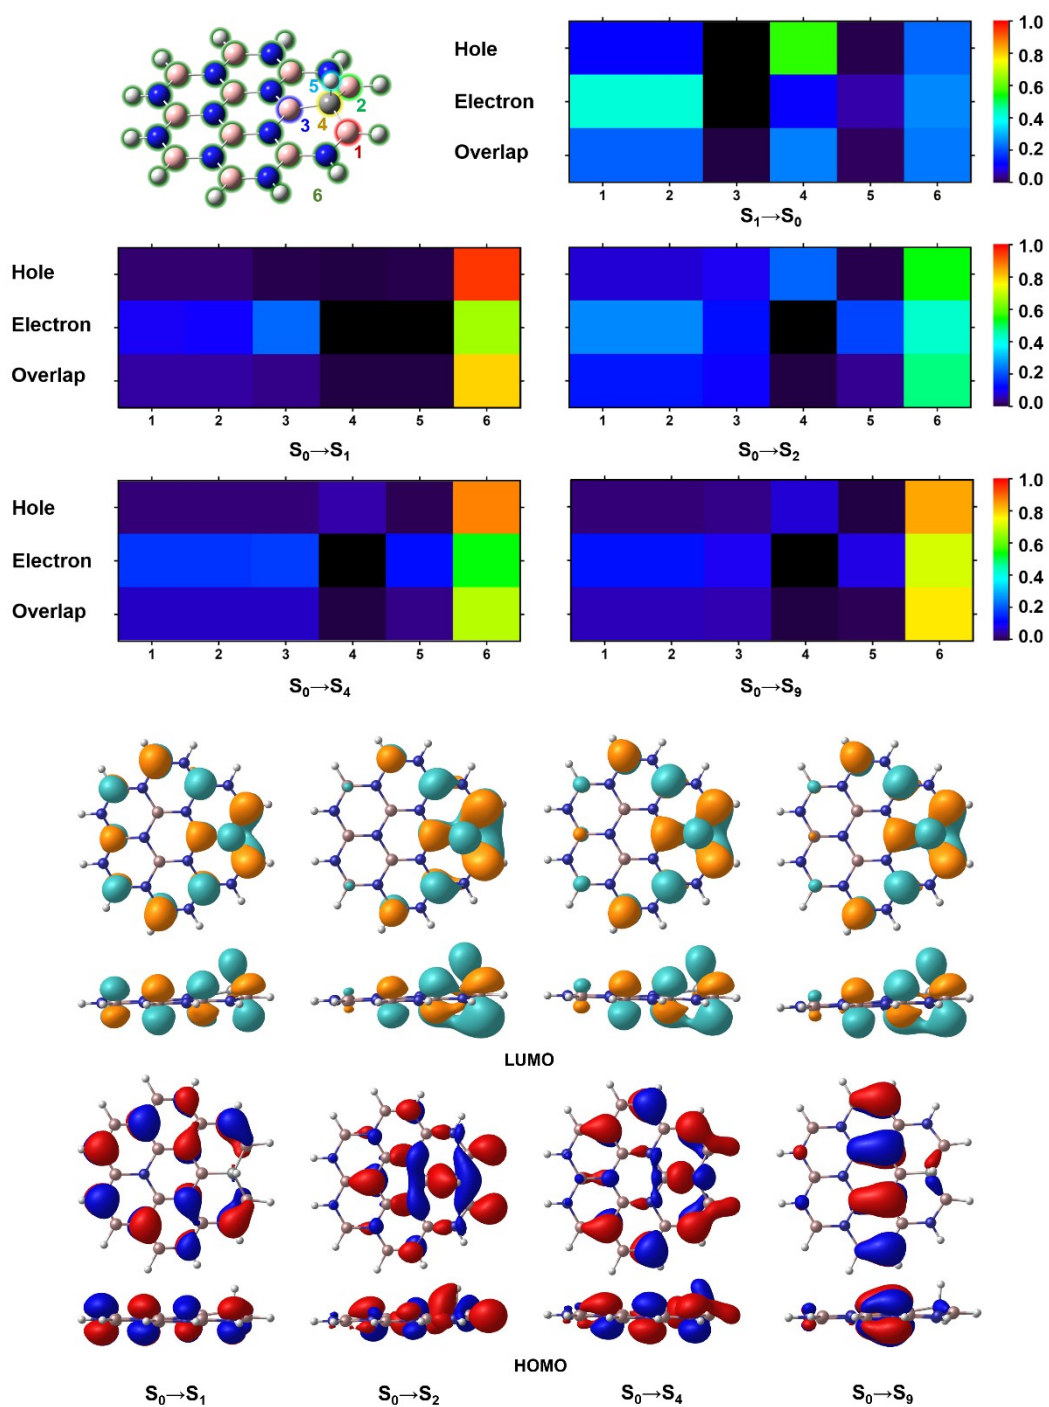

**Figure S10.** Electron–hole compositions in each fragment (top), and natural transition orbitals (NTO) in vertical excitation (down) for **d**.

**Table S10.** The Contribution (%) of Each Fragment to Electron and Hole in Vertical Excitation and Emission, also Collected the Overlap and Difference of Electron and Hole in Each Fragment for **d**.

|                                    | Fragment | Hole (%) | Electron (%) | Overlap (%) | Diff (%) |
|------------------------------------|----------|----------|--------------|-------------|----------|
| <b>S<sub>0</sub>→S<sub>1</sub></b> | 1        | 2.05     | 9.43         | 4.40        | 7.38     |
|                                    | 2        | 2.05     | 10.06        | 4.54        | 8.00     |
|                                    | 3        | 0.50     | 22.44        | 3.34        | 21.94    |
|                                    | 4        | 0.00     | -0.18        | 0.00        | -0.19    |
|                                    | 5        | 0.61     | -19.05       | 0.00        | -19.67   |
|                                    | 6        | 94.66    | 66.31        | 79.23       | -28.35   |
| <b>S<sub>0</sub>→S<sub>2</sub></b> | 1        | 7.31     | 25.50        | 13.65       | 18.19    |
|                                    | 2        | 7.32     | 25.44        | 13.64       | 18.12    |
|                                    | 3        | 8.71     | 12.71        | 10.52       | 4.00     |
|                                    | 4        | 22.03    | -24.97       | 0.00        | -47.00   |
|                                    | 5        | 0.77     | 18.60        | 3.79        | 17.83    |
|                                    | 6        | 53.86    | 42.73        | 47.97       | -11.13   |
| <b>S<sub>0</sub>→S<sub>4</sub></b> | 1        | 2.43     | 16.68        | 6.37        | 14.24    |
|                                    | 2        | 2.43     | 16.71        | 6.37        | 14.27    |
|                                    | 3        | 2.43     | 17.94        | 6.60        | 15.51    |
|                                    | 4        | 4.83     | -17.94       | 0.00        | -22.77   |
|                                    | 5        | 0.85     | 12.80        | 3.29        | 11.95    |
|                                    | 6        | 87.03    | 53.82        | 68.44       | -33.21   |
| <b>S<sub>0</sub>→S<sub>9</sub></b> | 1        | 2.62     | 13.06        | 5.86        | 10.44    |
|                                    | 2        | 2.63     | 13.15        | 5.88        | 10.53    |
|                                    | 3        | 3.30     | 8.69         | 5.36        | 5.39     |
|                                    | 4        | 7.15     | -14.08       | 0.00        | -21.23   |
|                                    | 5        | 0.16     | 7.99         | 1.13        | 7.83     |
|                                    | 6        | 84.13    | 71.18        | 77.38       | -12.95   |
| <b>S<sub>1</sub>→S<sub>0</sub></b> | 1        | 11.11    | 41.54        | 21.49       | 30.43    |
|                                    | 2        | 11.12    | 41.56        | 21.50       | 30.44    |
|                                    | 3        | -0.93    | -24.73       | 0.00        | -23.80   |
|                                    | 4        | 56.02    | 10.95        | 24.76       | -45.07   |
|                                    | 5        | 0.44     | 5.11         | 1.50        | 4.67     |
|                                    | 6        | 22.24    | 25.57        | 23.85       | 3.34     |

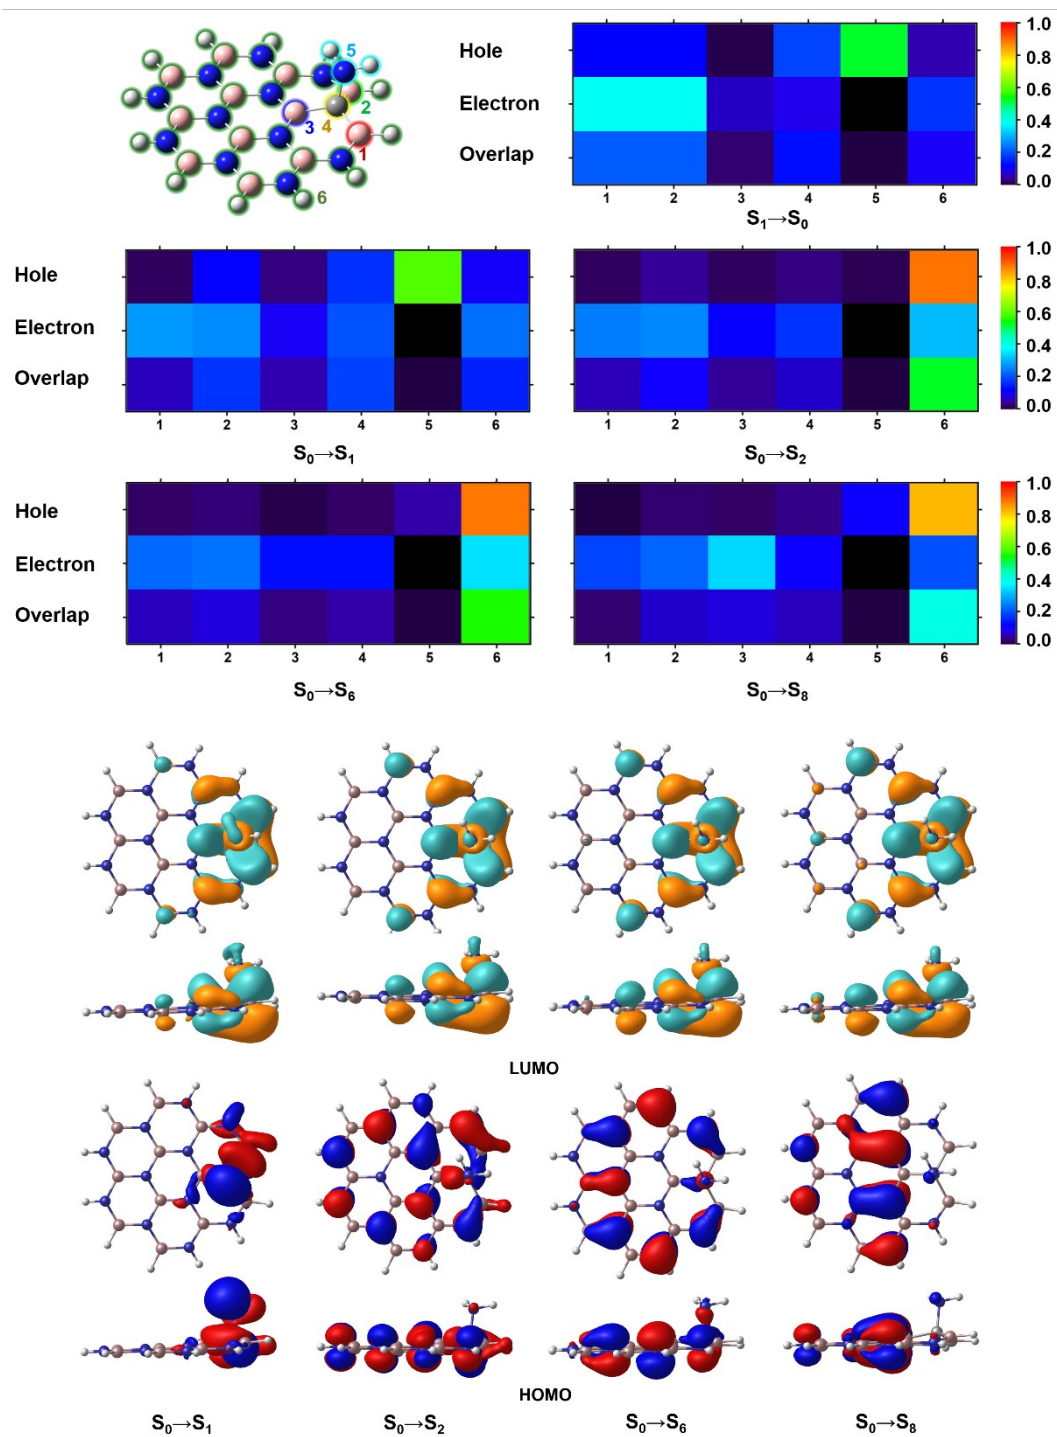

**Figure S11.** Electron–hole compositions in each fragment (top), and natural transition orbitals (NTO) in vertical excitation (down) for  $e$ .

**Table S11.** The Contribution (%) of Each Fragment to Electron and Hole in Vertical Excitation and Emission, also Collected the Overlap and Difference of Electron and Hole in Each Fragment for e.

|                       | Fragment | Hole (%) | Electron (%) | Overlap (%) | Diff (%) |
|-----------------------|----------|----------|--------------|-------------|----------|
| $S_0 \rightarrow S_1$ | 1        | 1.42     | 27.22        | 6.21        | 25.81    |
|                       | 2        | 11.03    | 25.62        | 16.81       | 14.60    |
|                       | 3        | 2.94     | 9.14         | 5.19        | 6.20     |
|                       | 4        | 16.45    | 20.14        | 18.20       | 3.69     |
|                       | 5        | 58.54    | -5.17        | 0.00        | -63.71   |
|                       | 6        | 9.63     | 23.05        | 14.90       | 13.42    |
| $S_0 \rightarrow S_2$ | 1        | 1.43     | 24.17        | 5.89        | 22.73    |
|                       | 2        | 4.08     | 25.24        | 10.15       | 21.15    |
|                       | 3        | 1.57     | 10.86        | 4.13        | 9.29     |
|                       | 4        | 2.98     | 16.62        | 7.03        | 13.64    |
|                       | 5        | 1.02     | -7.84        | 0.00        | -8.86    |
|                       | 6        | 88.92    | 30.96        | 52.47       | -57.96   |
| $S_0 \rightarrow S_6$ | 1        | 1.77     | 22.07        | 6.24        | 20.30    |
|                       | 2        | 2.46     | 23.55        | 7.62        | 21.09    |
|                       | 3        | 0.74     | 12.78        | 3.08        | 12.04    |
|                       | 4        | 1.74     | 12.88        | 4.74        | 11.13    |
|                       | 5        | 4.77     | -5.63        | 0.00        | -10.40   |
|                       | 6        | 88.52    | 34.36        | 55.15       | -54.15   |
| $S_0 \rightarrow S_8$ | 1        | 0.24     | 18.77        | 2.10        | 18.54    |
|                       | 2        | 2.16     | 21.75        | 6.86        | 19.58    |
|                       | 3        | 1.73     | 33.75        | 7.64        | 32.03    |
|                       | 4        | 3.34     | 10.61        | 5.95        | 7.27     |
|                       | 5        | 10.49    | -4.90        | 0.00        | -15.40   |
|                       | 6        | 82.04    | 20.02        | 40.53       | -62.02   |
| $S_1 \rightarrow S_0$ | 1        | 11.44    | 38.94        | 21.11       | 27.49    |
|                       | 2        | 11.44    | 38.96        | 21.11       | 27.51    |
|                       | 3        | 0.76     | 6.56         | 2.23        | 5.81     |
|                       | 4        | 18.88    | 8.50         | 12.67       | -10.38   |
|                       | 5        | 52.34    | -9.68        | 0.00        | -62.02   |
|                       | 6        | 5.14     | 16.72        | 9.27        | 11.58    |

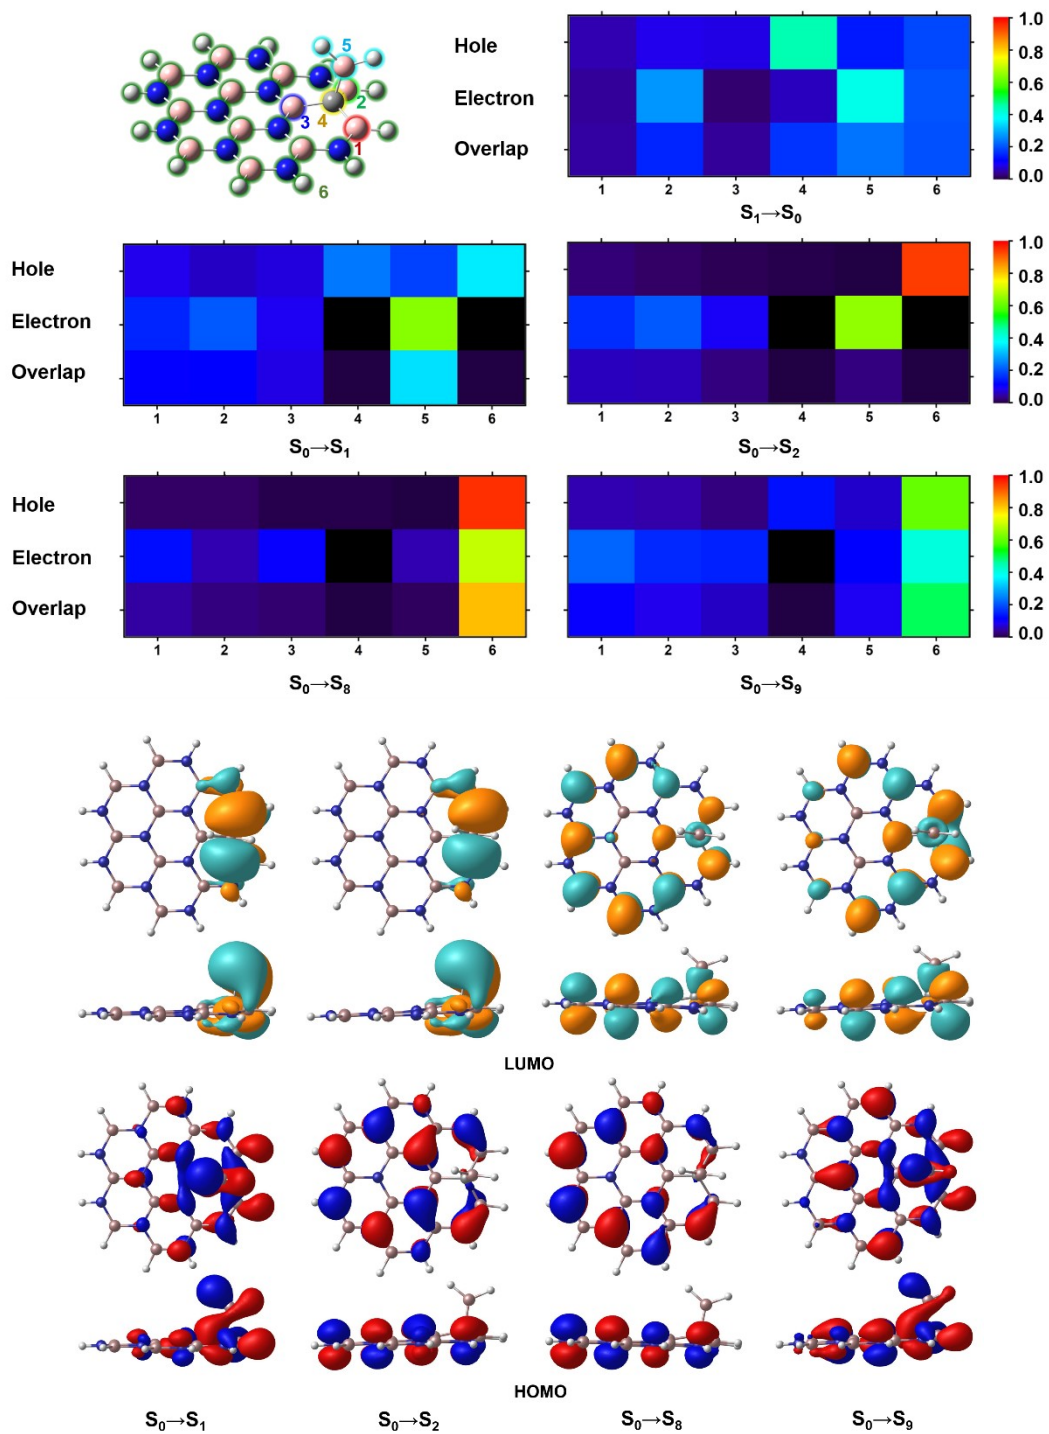

**Figure S12.** Electron–hole compositions in each fragment (top), and natural transition orbitals (NTO) in vertical excitation (down) for **f**.



**Table S12.** The Contribution (%) of Each Fragment to Electron and Hole in Vertical Excitation and Emission, also Collected the Overlap and Difference of Electron and Hole in Each Fragment for **f**.

|                       | Fragment | Hole (%) | Electron (%) | Overlap (%) | Diff (%) |
|-----------------------|----------|----------|--------------|-------------|----------|
| $S_0 \rightarrow S_1$ | 1        | 8.41     | 15.24        | 11.32       | 6.84     |
|                       | 2        | 6.42     | 20.49        | 11.47       | 14.08    |
|                       | 3        | 7.68     | 8.73         | 8.18        | 1.05     |
|                       | 4        | 23.69    | -4.72        | 0.00        | -28.41   |
|                       | 5        | 18.32    | 64.15        | 34.28       | 45.83    |
|                       | 6        | 35.49    | -3.90        | 0.00        | -39.39   |
| $S_0 \rightarrow S_2$ | 1        | 2.48     | 15.90        | 6.28        | 13.42    |
|                       | 2        | 1.68     | 20.72        | 5.89        | 19.05    |
|                       | 3        | 0.96     | 9.27         | 2.98        | 8.31     |
|                       | 4        | 0.67     | -7.21        | 0.00        | -7.88    |
|                       | 5        | 0.15     | 64.90        | 3.14        | 64.75    |
|                       | 6        | 94.07    | -3.57        | 0.00        | -97.64   |
| $S_0 \rightarrow S_8$ | 1        | 1.63     | 12.99        | 4.60        | 11.36    |
|                       | 2        | 1.59     | 5.40         | 2.93        | 3.81     |
|                       | 3        | 0.41     | 10.82        | 2.11        | 10.41    |
|                       | 4        | 0.75     | -4.05        | 0.00        | -4.80    |
|                       | 5        | 0.31     | 5.35         | 1.29        | 5.04     |
|                       | 6        | 95.31    | 69.49        | 81.38       | -25.83   |
| $S_0 \rightarrow S_9$ | 1        | 5.45     | 21.75        | 10.88       | 16.31    |
|                       | 2        | 4.84     | 15.38        | 8.62        | 10.54    |
|                       | 3        | 2.87     | 14.90        | 6.54        | 12.02    |
|                       | 4        | 13.04    | -5.84        | 0.00        | -18.88   |
|                       | 5        | 6.82     | 11.57        | 8.88        | 4.76     |
|                       | 6        | 60.41    | 40.96        | 49.75       | -19.45   |
| $S_1 \rightarrow S_0$ | 1        | 5.25     | 4.24         | 4.72        | -1.00    |
|                       | 2        | 8.65     | 27.10        | 15.31       | 18.45    |
|                       | 3        | 8.04     | 2.20         | 4.20        | -5.84    |
|                       | 4        | 45.14    | 6.16         | 16.67       | -38.98   |
|                       | 5        | 13.97    | 39.84        | 23.59       | 25.87    |
|                       | 6        | 18.95    | 20.46        | 19.69       | 1.51     |

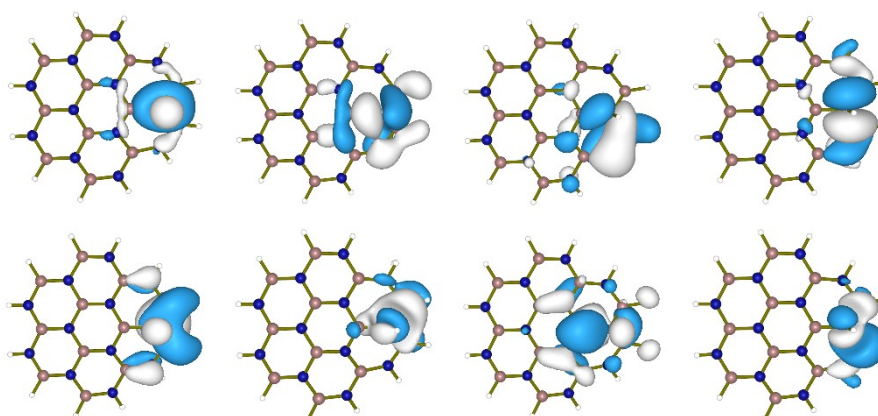

**Figure S13.** Molecular orbitals of **d** used in defining the active space for MS-CASPT2(8e/8o) calculation.

**Table S13.** MS-CASPT2 Evaluated Emission Energy (eV) and Wavelength ( $\lambda$ /nm) in Gas Phase.

|          | Root 1       | Root 2       | $E_{\perp}$ (eV) | $\lambda$ (nm) |
|----------|--------------|--------------|------------------|----------------|
| <b>a</b> | -1058.700694 | -1058.596221 | 2.84             | 436            |
| <b>b</b> | -1019.517768 | -1019.428509 | 2.43             | 510            |
| <b>c</b> | -1057.535622 | -1057.465675 | 1.90             | 651            |
| <b>d</b> | -944.4494865 | -944.3915562 | 1.58             | 787            |
| <b>e</b> | -999.6725762 | -999.6155484 | 1.55             | 799            |
| <b>f</b> | -969.8234327 | -969.7830014 | 1.10             | 1127           |

**Table S14.** Calculated Vertical Emission Energies ( $E_{\perp}$ /eV), Wavelength ( $\lambda$ /nm), Oscillator Strengths ( $f$ ) in Gas Phase and N,N-Dimethyl Formamide (DMF) Solution.

|                                        | $E_{\perp}$ (eV) | $\lambda$ (nm) | $f$    |
|----------------------------------------|------------------|----------------|--------|
| <b>In Gas Phase</b>                    |                  |                |        |
| <b>a</b>                               | 2.78             | 446            | 0.0010 |
| <b>b</b>                               | 2.18             | 570            | 0.0035 |
| <b>c</b>                               | 2.07             | 598            | 0.0011 |
| <b>d</b>                               | 1.76             | 703            | 0.0183 |
| <b>e</b>                               | 1.62             | 766            | 0.0003 |
| <b>f</b>                               | 1.32             | 940            | 0.0034 |
| <b>g</b>                               | 2.70             | 460            | 0.0010 |
| <b>In DMF Solution</b>                 |                  |                |        |
| <b>a</b>                               | 2.89             | 429            | 0.0013 |
| <b>b</b>                               | 2.32             | 534            | 0.0063 |
| <b>c</b>                               | 2.18             | 570            | 0.0020 |
| <b>d</b>                               | 1.88             | 661            | 0.0300 |
| <b>e</b>                               | 1.81             | 684            | 0.0007 |
| <b>f</b>                               | 1.44             | 863            | 0.0056 |
| <b>g</b>                               | 2.89             | 429            | 0.0027 |
| <b>g<sup><math>\sigma</math></sup></b> | 3.09             | 401            | 0.0056 |

Note: **g**: modified BNQDs that doped C atom connects with -COOH group  <sup>$\sigma$</sup> ; in aqueous solution

**Table S15.** Computed HOMO (H), LUMO(L) and HOMO–LUMO (H–L) Gap Energies (eV) of BNQDs **a-f** at  $S_0$  and  $S_1$  Minima.

| Energy   | $S_0$  |        |          | $S_1$  |        |          |
|----------|--------|--------|----------|--------|--------|----------|
|          | H (eV) | L (eV) | H–L (eV) | H (eV) | L (eV) | H–L (eV) |
| <b>a</b> | –6.50  | –1.34  | 5.16     | –5.71  | –1.58  | 4.13     |
| <b>b</b> | –6.90  | –1.37  | 5.53     | –5.48  | –1.87  | 3.60     |
| <b>c</b> | –6.95  | –1.31  | 5.64     | –6.83  | –3.24  | 3.59     |
| <b>d</b> | –6.88  | –0.42  | 6.46     | –5.49  | –2.48  | 3.00     |
| <b>e</b> | –6.26  | –0.96  | 5.30     | –4.57  | –1.64  | 2.93     |
| <b>f</b> | –6.91  | –1.63  | 5.28     | –6.14  | –3.56  | 2.58     |

**Table S16.** Computed  $S_r$  Index (a.u.),  $D$  Index (Å),  $H$  Index (Å) and  $t$  Index (Å) in Electron Excitation and Emission Process.

|          |                       | $S_r$ index (a.u.) | $D$ index (Å) | $H$ index (Å) | $t$ index (Å) |
|----------|-----------------------|--------------------|---------------|---------------|---------------|
| <b>a</b> | $S_0 \rightarrow S_1$ | 0.51697            | 1.070         | 2.193         | –0.154        |
|          | $S_1 \rightarrow S_0$ | 0.49168            | 0.841         | 2.250         | –0.313        |
| <b>b</b> | $S_0 \rightarrow S_1$ | 0.52475            | 0.704         | 3.709         | –0.474        |
|          | $S_1 \rightarrow S_0$ | 0.49821            | 0.820         | 2.082         | –0.303        |
| <b>c</b> | $S_0 \rightarrow S_1$ | 0.54750            | 0.599         | 1.848         | –0.478        |
|          | $S_1 \rightarrow S_0$ | 0.56908            | 0.903         | 1.955         | –0.183        |
| <b>d</b> | $S_0 \rightarrow S_1$ | 0.48898            | 1.192         | 3.709         | –1.375        |
|          | $S_1 \rightarrow S_0$ | 0.53665            | 0.798         | 2.012         | –0.156        |
| <b>e</b> | $S_0 \rightarrow S_1$ | 0.50063            | 0.960         | 2.326         | –0.354        |
|          | $S_1 \rightarrow S_0$ | 0.44864            | 1.380         | 2.060         | 0.184         |
| <b>f</b> | $S_0 \rightarrow S_1$ | 0.51934            | 1.109         | 2.378         | –0.194        |
|          | $S_1 \rightarrow S_0$ | 0.56072            | 1.218         | 2.018         | –0.022        |

**Table S17.** B3LYP-D3BJ/6-311++G\*\*/SMD Computed Total Energies (Unit: Hartree) of Doped BNQDs at the Ground State.

|                |                |                |
|----------------|----------------|----------------|
| <b>a</b>       | <b>b</b>       | <b>c</b>       |
| –1062.46912344 | –1023.16361569 | –1061.30119964 |
| <b>d</b>       | <b>e</b>       | <b>f</b>       |
| –947.93782325  | –1003.29354447 | –973.391528682 |
